# Supplementary material for: Six Years in the Life of a Mother Bear - The Longest Continuous Heart Rate Recordings from a Free-Ranging Mammal
Source: PubMed Central journal article supplement (PMC5240622; doi:10.1038/srep40732), 2017-01-17
Supplement: srep40732-s1.pdf [file srep40732-s1.pdf]

# **Six Years in the Life of a Mother Bear - The Longest Continuous Heart Rate Recordings from a Free-Ranging Mammal**

Timothy G Laske, Paul A Iaizzo, and David L Garshelis

Supplementary Video V1: Female black bear #2213 and her cubs hibernating in an open nest in northern Minnesota (March 2009).
